# Supplementary material for: Photocatalytic CO2 reduction using water as an electron donor by a powdered Z-scheme system consisting of metal sulfide and an RGO–TiO2 composite
Source: Royal Society of Chemistry journal article supplement (doi:10.1039/c6fd00215c), 2017-01-01
Supplement: c6fd00215c1.pdf [file c6fd00215c1.pdf]

## Supporting Information

### Photocatalytic CO<sub>2</sub> Reduction Using Water as an Electron Donor by A Powdered Z-Scheme System Consisting of Metal Sulfide and An RGO-TiO<sub>2</sub> Composite

Tomoaki Takayama,<sup>1</sup> Ko Sato,<sup>1</sup> Takehiro Fujimura,<sup>1</sup> Yuki Kojima,<sup>1</sup> Akihide Iwase,<sup>1, 2</sup> Akihiko Kudo\*<sup>1, 2</sup>

<sup>1</sup>Department of Applied Chemistry, Faculty of Science, Tokyo University of Science, 1-3 Kagurazaka, Shinjuku-ku, Tokyo, 162-8601, Japan; <sup>2</sup>Photocatalysis International Research Center, Research Institute for Science and Technology, Tokyo University of Science, 2641 Yamazaki, Noda-shi, Chiba, 278-8510, Japan

\*Corresponding author, Fax: +81-3-5261-4631, E-mail: a-kudo@rs.kagu.tus.ac.jp

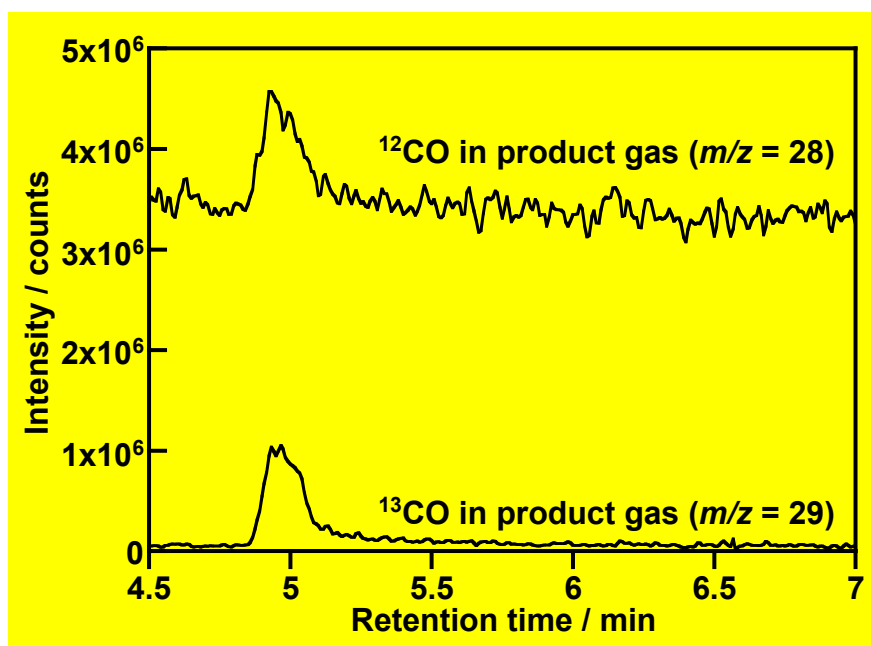

**Figure S1.** Analysis of products for <sup>13</sup>CO<sub>2</sub> reduction over a Z-schematic photocatalyst system consisting of CuGaS<sub>2</sub> and RGO-TiO<sub>2</sub>.

Catalyst: 0.2 (CuGaS<sub>2</sub>) and 0.4 (RGO-TiO<sub>2</sub>) g, reactant solution: 360 mL of water under 1 atm of <sup>13</sup>CO<sub>2</sub> atmosphere, reactor: a gas flow system using an inner irradiation cell made of Pyrex, light source: a 400 W high-pressure mercury lamp. The elevated background for <sup>12</sup>CO is due to N<sub>2</sub> of an impurity in a carrier gas.

**Table S1** Effect of loading cocatalyst on CO<sub>2</sub> reduction using water as an electron donor on CuGaS<sub>2</sub>-(RGO-TiO<sub>2</sub>) of a Z-scheme photocatalyst system.

| Entry | CO <sub>2</sub> -photocatalyst |                    | O <sub>2</sub> -photocatalyst | Gas             | Activity / $\mu\text{mol h}^{-1}$ |                |      | $e^-/h^+$ |
|-------|--------------------------------|--------------------|-------------------------------|-----------------|-----------------------------------|----------------|------|-----------|
|       | Cocatalyst                     | Metal sulfide      | Metal oxide                   |                 | H <sub>2</sub>                    | O <sub>2</sub> | CO   |           |
| 1     | None                           | CuGaS <sub>2</sub> | RGO-TiO <sub>2</sub>          | CO <sub>2</sub> | 28.8                              | 11.2           | 0.15 | 1.29      |
| 2     | Pt <sup>a)</sup>               | CuGaS <sub>2</sub> | RGO-TiO <sub>2</sub>          | CO <sub>2</sub> | 33.1                              | 14.1           | 0.09 | 1.18      |
| 3     | Ru <sup>b)</sup>               | CuGaS <sub>2</sub> | RGO-TiO <sub>2</sub>          | CO <sub>2</sub> | 32.0                              | 13.1           | 0.04 | 1.22      |
| 4     | Rh <sup>b)</sup>               | CuGaS <sub>2</sub> | RGO-TiO <sub>2</sub>          | CO <sub>2</sub> | 17.7                              | 6.9            | 0.04 | 1.29      |
| 5     | Ag <sup>a)</sup>               | CuGaS <sub>2</sub> | RGO-TiO <sub>2</sub>          | CO <sub>2</sub> | 17.2                              | 4.4            | 0.11 | 1.97      |

Catalyst: 0.1 g each, reactant solution: 120 mL of water under 1 atm of CO<sub>2</sub>, reactor: a gas flow system using a top-irradiation cell made of Pyrex, light source: a 300 W Xe-lamp ( $\lambda > 330$  nm). Loading method: <sup>a)</sup> adsorption, <sup>b)</sup> photodeposition.

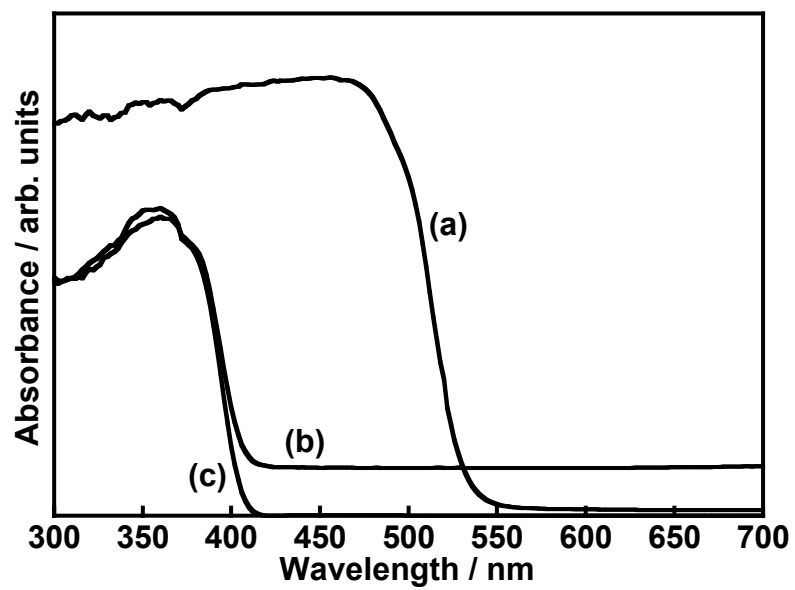

**Figure S2.** Diffuse reflectance spectra of (a) CuGaS<sub>2</sub>, (b) RGO(5 wt%)-incorporated TiO<sub>2</sub> (rutile), and (c) pristine TiO<sub>2</sub> (rutile).
